# Supplementary material for: Peptides containing blocks of different charge densities facilitate cell uptake of oligonucleotides
Source: Royal Society of Chemistry journal article supplement (doi:10.1039/c4cp05988c), 2015-01-01
Supplement: c4cp05988c1.pdf [file c4cp05988c1.pdf]

Supporting information for

## Peptides Containing Blocks of Different Charge Densities Facilitate Cell Uptake of Oligonucleotide

*Jihan Zhou<sup>‡</sup>, Dong Li<sup>‡</sup>, Cuicui Su, Hao Wen, Quan Da<sup>\*</sup>, and Dehai Liang<sup>\*</sup>,*

Beijing National Laboratory for Molecular Sciences and the Key Laboratory of Polymer Chemistry and Physics of Ministry of Education, College of Chemistry and Molecular Engineering; State Key Laboratory of Natural and Biomimetic Drugs, School of Pharmaceutical Sciences; Institute of Molecular Medicine, Peking University, Beijing 100871, China.

Table S1: Effective charge of the peptides as calculated by JaMBW 1.1

| Peptide                                    | Sequence                                              | Isoelectric point | Effective charges |
|--------------------------------------------|-------------------------------------------------------|-------------------|-------------------|
| (KKKK) <sub>5</sub>                        | Ac-KKKK KKKK KKKK KKKK KKKK-amide                     | 11.74             | 19                |
| (KGKG) <sub>5</sub>                        | Ac-KGKG KGKG KGKG KGKG KGKG-amide                     | 11.44             | 10                |
| (KGGG) <sub>5</sub>                        | Ac-KGGG KGGG KGGG KGGG KGGG-amide                     | 11.10             | 5                 |
| (KKKK) <sub>5</sub> -b-(KGKG) <sub>5</sub> | Ac-KKKK KKKK KKKK KKKK KKKK KGKG KGKG GKGK GKGK-amide | 11.93             | 29                |
| (KKKK) <sub>5</sub> -b-(KGGG) <sub>5</sub> | Ac-KKKK KKKK KKKK KKKK KKKK GGGK GGGK GGGK GGGK-amide | 11.85             | 24                |

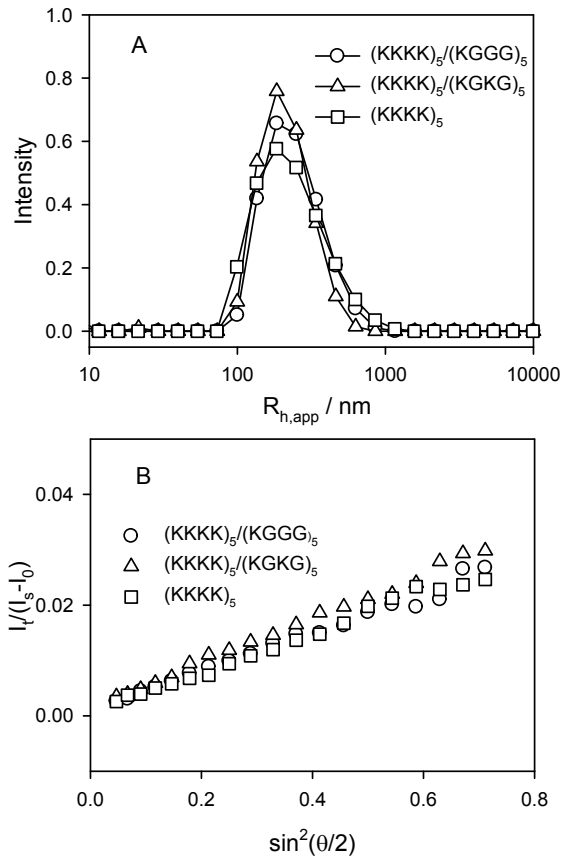

Figure S1. The size distribution (A) and the angular dependence of the inversed excess scattered intensity (B) of the complexes. The complexes were formed by mixing a 21 bp ds-oligo with  $(\text{K}(\text{K}(\text{K}(\text{K}))_5)$  peptide, the mixture of  $(\text{K}(\text{K}(\text{K}(\text{K}))_5)/(\text{K}(\text{G}(\text{G}(\text{G}))_5)$  or  $(\text{K}(\text{K}(\text{K}(\text{K}))_5)/(\text{K}(\text{G}(\text{K}(\text{G}))_5)$ , at a +/- ratio of 6.4.  $c(\text{K}(\text{K}(\text{K}(\text{K}))_5) = c(\text{K}(\text{G}(\text{G}(\text{G}))_5) = c(\text{K}(\text{G}(\text{K}(\text{G}))_5) = 5.0 \times 10^{-6} \text{ g/mL}$ ,  $c(\text{oligonucleotide}) = 1.0 \times 10^{-5} \text{ g/mL}$ .

### Confocal microscopy images of cell uptake

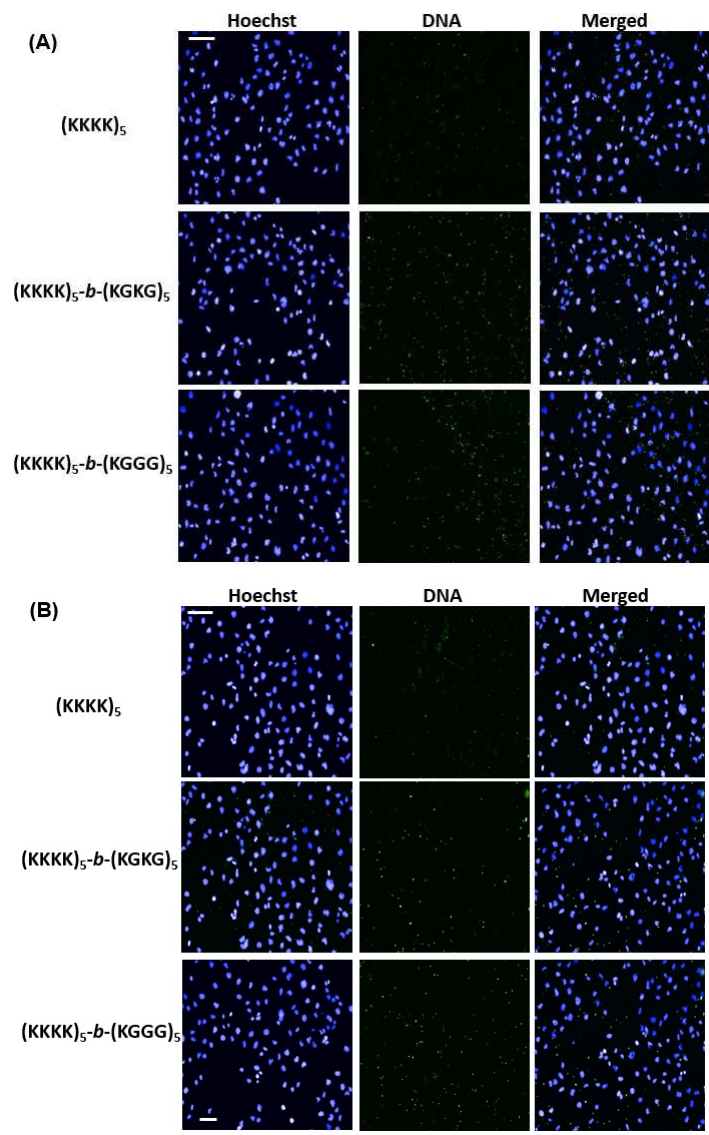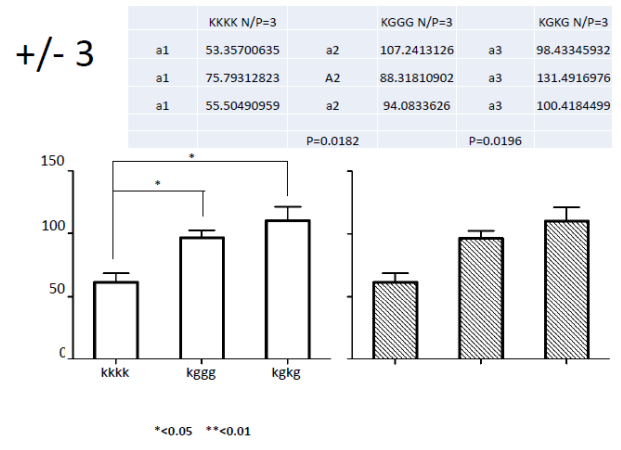

+/- 9

|    | KKKK N/P=9  |    | KGGG N/P=9  |    | KGKG N/P=9  |
|----|-------------|----|-------------|----|-------------|
| b1 | 57.71       | b2 | 69.72861602 | b3 | 93.92985066 |
| b1 | 47.00132173 | b2 | 76.76972163 | b3 | 99.99322364 |
| b1 | 49.62391041 | b2 | 69.7038451  | b3 | 108.0787876 |
| b1 | 61.66087594 | b2 | 95.09141768 | b3 | 80.74738295 |
|    |             |    | P=0.0136    |    | p=0.0008    |

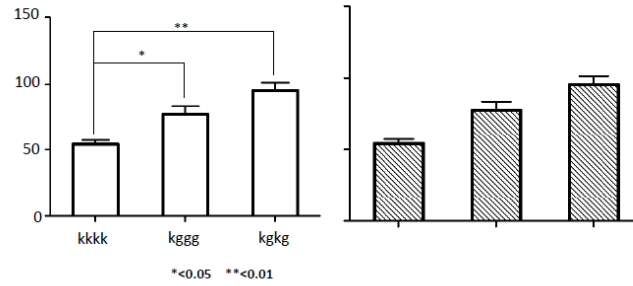

**Figure S2.** Confocal microscopy images of cell uptake of the oligonucleotide via peptides. Hoechst 33342 counterstaining was used to indicate nuclei (blue) and oligonucleotide was labeled by FITC (green). Oligonucleotide amount: 100ng/well, +/- = 3.0 (A) +/- = 9.0 (B), scale bar: 10  $\mu$ m. The statistical analysis at corresponding charge ratios are also attached.
